# Supplementary material for: Health Risk Assessment of Toxic and Harmful Air Pollutants Discharged by a Petrochemical Company in the Beijing-Tianjin-Hebei Region of China
Source: MDPI journal article supplement (doi:10.3390/atmos12121604), 2021-11-30
Supplement: s1 [file s1]

Archive with 1 entries (1 files):
- atmosphere-1483400-supplementary.pdf
