# Supplementary material for: Health Risk Assessment of Toxic and Harmful Air Pollutants Discharged by a Petrochemical Company in the Beijing-Tianjin-Hebei Region of China
Source: MDPI journal article supplement (doi:10.3390/atmos12121604), 2021-11-30
Supplement: s1 [file s1 › atmosphere-1483400-supplementary.pdf]

# Supplementary Materials: Health Risk Assessment of Toxic and Harmful Air Pollutants Discharged by a Petrochemical Company in the Beijing-Tianjin-Hebei Region of China

Tao Zhu <sup>1,2,\*</sup>, Furong Li <sup>1</sup>, Wenfeng Niu <sup>1</sup>, Zijun Gao <sup>1</sup>, Yiwei Han <sup>1</sup> and Xing Zhang <sup>1</sup>

<sup>1</sup> School of Chemical & Environmental Engineering, China University of Mining & Technology (Beijing), Beijing 100083, China; lifurong1026@gmail.com (F.L.); niuwenfeng188@gmail.com (W.N.); gaozijun7313@gmail.com (Z.G.); hanyw@student.cumtb.edu.cn (Y.H.); zhangxing@student.cumtb.edu.cn (X.Z.)

<sup>2</sup> State Key Laboratory of Petroleum Pollution Control, Beijing 102206, China

\* Correspondence: bamboozt@cumtb.edu.cn; Tel.: +86-010-62339170

## 1. Total amount of pollutants and typical monomer test results

Due to various reasons, this study cannot perform sampling at the boundary of each emission source after diffusion. Therefore, Table S1 is a sample taken at the chimney opening of a stationary emission source according to the requirements of the China Environmental Protection Agency.

According to the test results, in the company's organized emissions, the main substances that constituted HAPs were benzene, toluene, and xylene. The sum of the mass concentrations of these three types of substances accounted for more than 75% of the total concentration of VOCs, and the sum of detection frequencies accounted for more than 85% of the total number of detections, far greater than the sum of other detected monomers. Among other VOC monomers, substances such as ethylbenzene, trimethylbenzene, dichlorobenzene, styrene, etc. were detected, appearing randomly and accidentally and therefore with no statistical value. Therefore, this study took benzene, toluene, and xylene as the main pollutants to participate in the statistics. The test results were shown in Table S1 below:

**Table S1.** The total amount of organized emissions of fixed sources of VOC and the test results of major pollutants.

| Point | Type    | Result                             | Mar                  | Jun                  | Sept                 | Min                  | Max                  | Average              |
|-------|---------|------------------------------------|----------------------|----------------------|----------------------|----------------------|----------------------|----------------------|
| A     | VOCs    | Concentration (mg/m <sup>3</sup> ) | 0.059                | 0.142                | 0.221                | 0.059                | 0.221                | 0.141                |
|       |         | Emission rate (kg/h)               | 2.4×10 <sup>-3</sup> | 4.5×10 <sup>-3</sup> | 7.8×10 <sup>-3</sup> | 2.1×10 <sup>-3</sup> | 7.9×10 <sup>-3</sup> | 5.2×10 <sup>-3</sup> |
|       | Benzene | Concentration (mg/m <sup>3</sup> ) | 0.013                | 0.007                | 0.019                | 0.007                | 0.019                | 0.013                |
|       |         | Emission rate (kg/h)               | 4.7×10 <sup>-4</sup> | 2.5×10 <sup>-4</sup> | 6.9×10 <sup>-4</sup> | 2.5×10 <sup>-4</sup> | 6.9×10 <sup>-4</sup> | 4.7×10 <sup>-4</sup> |
|       | Toluene | Concentration (mg/m <sup>3</sup> ) | ND                   | 0.007                | 0.019                | ND                   | 0.019                | 0.009                |
|       |         | Emission rate (kg/h)               | 7.3×10 <sup>-5</sup> | 2.5×10 <sup>-4</sup> | 6.9×10 <sup>-4</sup> | 7.3×10 <sup>-5</sup> | 6.9×10 <sup>-4</sup> | 3.4×10 <sup>-4</sup> |
|       | Xylene  | Concentration (mg/m <sup>3</sup> ) | ND                   | ND                   | 0.130                | ND                   | 0.130                | 0.045                |
|       |         | Emission rate (kg/h)               | 7.3×10 <sup>-5</sup> | 7.2×10 <sup>-5</sup> | 4.6×10 <sup>-3</sup> | 7.2×10 <sup>-5</sup> | 4.6×10 <sup>-3</sup> | 1.6×10 <sup>-3</sup> |
|       | B VOCs  | Concentration (mg/m <sup>3</sup> ) | 0.075                | 0.005                | 0.948                | 0.005                | 0.948                | 0.343                |
|       |         | Emission rate (kg/h)               | 2.1×10 <sup>-3</sup> | 1.4×10 <sup>-4</sup> | 2.5×10 <sup>-2</sup> | 1.4×10 <sup>-4</sup> | 2.5×10 <sup>-2</sup> | 9.1×10 <sup>-3</sup> |

| Point | Type    | Result                             | Mar                  | Jun                  | Sept                 | Min                  | Max                  | Average              |
|-------|---------|------------------------------------|----------------------|----------------------|----------------------|----------------------|----------------------|----------------------|
| C     | Benzene | Concentration (mg/m <sup>3</sup> ) | 0.026                | 0.005                | 0.100                | 0.005                | 0.100                | 0.044                |
|       |         | Emission rate (kg/h)               | 7.2×10 <sup>-5</sup> | 1.6×10 <sup>-5</sup> | 2.5×10 <sup>-4</sup> | 1.6×10 <sup>-5</sup> | 2.5×10 <sup>-4</sup> | 1.1×10 <sup>-4</sup> |
|       | Toluene | Concentration (mg/m <sup>3</sup> ) | 0.007                | ND                   | 0.060                | ND                   | 0.060                | 0.023                |
|       |         | Emission rate (kg/h)               | 2.0×10 <sup>-4</sup> | 5.4×10 <sup>-5</sup> | 1.6×10 <sup>-3</sup> | 5.4×10 <sup>-5</sup> | 1.6×10 <sup>-3</sup> | 6.2×10 <sup>-4</sup> |
|       | Xylene  | Concentration (mg/m <sup>3</sup> ) | 0.011                | 0.109                | ND                   | ND                   | 0.109                | 0.041                |
|       |         | Emission rate (kg/h)               | 3.1×10 <sup>-4</sup> | 2.9×10 <sup>-3</sup> | 5.4×10 <sup>-5</sup> | 5.4×10 <sup>-5</sup> | 2.9×10 <sup>-3</sup> | 1.1×10 <sup>-3</sup> |
|       | VOCs    | Concentration (mg/m <sup>3</sup> ) | 0.220                | ND                   | 0.181                | ND                   | 0.223                | 0.138                |
|       |         | Emission rate (kg/h)               | 7.0×10 <sup>-3</sup> | 6.3×10 <sup>-5</sup> | 5.7×10 <sup>-3</sup> | 6.3×10 <sup>-5</sup> | 7.0×10 <sup>-3</sup> | 4.3×10 <sup>-3</sup> |
|       | Benzene | Concentration (mg/m <sup>3</sup> ) | 0.054                | ND                   | 0.160                | ND                   | 0.160                | 0.072                |
|       |         | Emission rate (kg/h)               | 1.7×10 <sup>-3</sup> | 6.3×10 <sup>-5</sup> | 5.1×10 <sup>-4</sup> | 6.3×10 <sup>-5</sup> | 5.1×10 <sup>-4</sup> | 7.6×10 <sup>-4</sup> |
|       | Toluene | Concentration (mg/m <sup>3</sup> ) | 0.004                | ND                   | 0.160                | ND                   | 0.160                | 0.055                |
|       |         | Emission rate (kg/h)               | 1.2×10 <sup>-4</sup> | 6.3×10 <sup>-5</sup> | 5.1×10 <sup>-4</sup> | 6.3×10 <sup>-5</sup> | 5.1×10 <sup>-4</sup> | 2.3×10 <sup>-4</sup> |
| D     | Xylene  | Concentration (mg/m <sup>3</sup> ) | 0.096                | ND                   | ND                   | ND                   | 0.096                | 0.033                |
|       |         | Emission rate (kg/h)               | 2.9×10 <sup>-4</sup> | 6.3×10 <sup>-4</sup> | 6.3×10 <sup>-4</sup> | 6.3×10 <sup>-4</sup> | 2.9×10 <sup>-4</sup> | 1.0×10 <sup>-4</sup> |
|       | VOCs    | Concentration (mg/m <sup>3</sup> ) | 0.079                | ND                   | 1.48                 | ND                   | 1.48                 | 0.52                 |
|       |         | Emission rate (kg/h)               | 2.8×10 <sup>-3</sup> | 7.0×10 <sup>-5</sup> | 5.2×10 <sup>-2</sup> | 7.0×10 <sup>-5</sup> | 5.2×10 <sup>-2</sup> | 1.8×10 <sup>-2</sup> |
|       | Benzene | Concentration (mg/m <sup>3</sup> ) | 0.035                | ND                   | 0.105                | ND                   | 0.105                | 0.047                |
|       |         | Emission rate (kg/h)               | 1.3×10 <sup>-3</sup> | 7.0×10 <sup>-5</sup> | 3.7×10 <sup>-3</sup> | 7.0×10 <sup>-5</sup> | 3.7×10 <sup>-3</sup> | 1.7×10 <sup>-3</sup> |
|       | Toluene | Concentration (mg/m <sup>3</sup> ) | ND                   | ND                   | 0.091                | ND                   | 0.091                | 0.032                |
|       |         | Emission rate (kg/h)               | 7.1×10 <sup>-5</sup> | 7.0×10 <sup>-5</sup> | 3.2×10 <sup>-3</sup> | 7.0×10 <sup>-5</sup> | 3.2×10 <sup>-3</sup> | 1.1×10 <sup>-3</sup> |
|       | Xylene  | Concentration (mg/m <sup>3</sup> ) | ND                   | 0.221                | ND                   | ND                   | 0.202                | 0.077                |
|       |         | Emission rate (kg/h)               | 7.1×10 <sup>-5</sup> | 7.9×10 <sup>-3</sup> | 7.0×10 <sup>-5</sup> | 7.0×10 <sup>-5</sup> | 7.9×10 <sup>-3</sup> | 2.7×10 <sup>-3</sup> |
| E     | VOCs    | Concentration (mg/m <sup>3</sup> ) | 0.038                | 1.84                 | 0.178                | 0.036                | 1.93                 | 0.706                |
|       |         | Emission rate (kg/h)               | 2.1×10 <sup>-3</sup> | 0.13                 | 1.3×10 <sup>-2</sup> | 2.1×10 <sup>-3</sup> | 0.13                 | 4.2×10 <sup>-2</sup> |
|       | Benzene | Concentration (mg/m <sup>3</sup> ) | 0.013                | 0.009                | 0.014                | 0.009                | 0.014                | 0.012                |
|       |         | Emission rate (kg/h)               | 7.8×10 <sup>-4</sup> | 5.5×10 <sup>-4</sup> | 8.3×10 <sup>-4</sup> | 5.5×10 <sup>-4</sup> | 8.3×10 <sup>-4</sup> | 7.2×10 <sup>-4</sup> |
|       | Toluene | Concentration (mg/m <sup>3</sup> ) | ND                   | 0.051                | 0.019                | ND                   | 0.051                | 0.024                |
|       |         | Emission rate (kg/h)               |                      |                      |                      |                      |                      |                      |

| Point | Type    | Result                             | Mar                  | Jun                  | Sept                 | Min                  | Max                  | Average              |
|-------|---------|------------------------------------|----------------------|----------------------|----------------------|----------------------|----------------------|----------------------|
| F     | Xylene  | Emission rate (kg/h)               | 1.3×10 <sup>-4</sup> | 3.2×10 <sup>-3</sup> | 1.2×10 <sup>-3</sup> | 1.3×10 <sup>-4</sup> | 3.2×10 <sup>-3</sup> | 1.5×10 <sup>-3</sup> |
|       |         | Concentration (mg/m <sup>3</sup> ) | ND                   | ND                   | 1.50                 | ND                   | 1.50                 | 0.501                |
|       | VOCs    | Emission rate (kg/h)               | 1.1×10 <sup>-4</sup> | 1.3×10 <sup>-4</sup> | 9.0×10 <sup>-2</sup> | 1.3×10 <sup>-4</sup> | 9.2×10 <sup>-2</sup> | 3.1×10 <sup>-2</sup> |
|       |         | Concentration (mg/m <sup>3</sup> ) | 0.071                | 1.42                 | 0.243                | 0.071                | 1.40                 | 0.565                |
|       | Benzene | Emission rate (kg/h)               | 1.1×10 <sup>-3</sup> | 1.6×10 <sup>-2</sup> | 2.8×10 <sup>-3</sup> | 1.2×10 <sup>-3</sup> | 1.6×10 <sup>-2</sup> | 7.1×10 <sup>-3</sup> |
|       |         | Concentration (mg/m <sup>3</sup> ) | 0.011                | 0.007                | 0.023                | 0.007                | 0.023                | 0.014                |
|       | Toluene | Emission rate (kg/h)               | 1.5×10 <sup>-5</sup> | 8.4×10 <sup>-4</sup> | 2.7×10 <sup>-5</sup> | 8.7×10 <sup>-4</sup> | 2.6×10 <sup>-5</sup> | 1.8×10 <sup>-5</sup> |
|       |         | Concentration (mg/m <sup>3</sup> ) | ND                   | 0.026                | 0.028                | ND                   | 0.028                | 0.019                |
|       | Xylene  | Emission rate (kg/h)               | 2.9×10 <sup>-5</sup> | 3.2×10 <sup>-4</sup> | 3.4×10 <sup>-4</sup> | 2.9×10 <sup>-5</sup> | 3.4×10 <sup>-4</sup> | 2.3×10 <sup>-4</sup> |
|       |         | Concentration (mg/m <sup>3</sup> ) | ND                   | ND                   | 1.14                 | ND                   | 1.14                 | 0.381                |
|       | VOCs    | Emission rate (kg/h)               | 2.9×10 <sup>-5</sup> | 2.4×10 <sup>-5</sup> | 1.4×10 <sup>-2</sup> | 2.4×10 <sup>-5</sup> | 1.4×10 <sup>-2</sup> | 4.7×10 <sup>-3</sup> |
|       |         | Concentration (mg/m <sup>3</sup> ) | 0.049                | 0.791                | 0.893                | 0.049                | 0.893                | 0.578                |
|       | Benzene | Emission rate (kg/h)               | 4.2×10 <sup>-3</sup> | 8.7×10 <sup>-5</sup> | 5.9×10 <sup>-2</sup> | 4.2×10 <sup>-3</sup> | 5.9×10 <sup>-2</sup> | 2.1×10 <sup>-2</sup> |
|       |         | Concentration (mg/m <sup>3</sup> ) | 0.047                | 0.005                | 0.069                | 0.005                | 0.069                | 0.04                 |
|       | Toluene | Emission rate (kg/h)               | 4.0×10 <sup>-3</sup> | 8.7×10 <sup>-5</sup> | 4.6×10 <sup>-3</sup> | 8.7×10 <sup>-5</sup> | 4.6×10 <sup>-3</sup> | 2.9×10 <sup>-3</sup> |
|       |         | Concentration (mg/m <sup>3</sup> ) | ND                   | 0.018                | 0.059                | ND                   | 0.059                | 0.026                |
|       | Xylene  | Emission rate (kg/h)               | 8.8×10 <sup>-5</sup> | 8.7×10 <sup>-5</sup> | 3.3×10 <sup>-3</sup> | 8.8×10 <sup>-5</sup> | 3.3×10 <sup>-3</sup> | 1.1×10 <sup>-3</sup> |
|       |         | Concentration (mg/m <sup>3</sup> ) | ND                   | 0.118                | 0.636                | ND                   | 0.636                | 0.252                |
| G     | VOCs    | Emission rate (kg/h)               | 8.8×10 <sup>-5</sup> | 8.7×10 <sup>-5</sup> | 9.4×10 <sup>-3</sup> | 8.8×10 <sup>-5</sup> | 9.4×10 <sup>-3</sup> | 3.2×10 <sup>-3</sup> |
|       |         | Concentration (mg/m <sup>3</sup> ) | 0.394                | 1.58                 | 1.42                 | 0.394                | 1.58                 | 1.131                |
|       | Benzene | Emission rate (kg/h)               | 6.1×10 <sup>-3</sup> | 2.4×10 <sup>-2</sup> | 2.2×10 <sup>-2</sup> | 6.1×10 <sup>-3</sup> | 2.4×10 <sup>-2</sup> | 1.7×10 <sup>-2</sup> |
|       |         | Concentration (mg/m <sup>3</sup> ) | 0.089                | 0.007                | 0.112                | 0.007                | 0.112                | 0.069                |
|       | Toluene | Emission rate (kg/h)               | 1.3×10 <sup>-3</sup> | 1.2×10 <sup>-3</sup> | 1.6×10 <sup>-3</sup> | 1.2×10 <sup>-3</sup> | 1.6×10 <sup>-3</sup> | 1.5×10 <sup>-3</sup> |
|       |         | Concentration (mg/m <sup>3</sup> ) | 0.006                | 0.038                | 0.079                | 0.008                | 0.078                | 0.03                 |
|       | Xylene  | Emission rate (kg/h)               | 1.2×10 <sup>-4</sup> | 5.6×10 <sup>-4</sup> | 1.3×10 <sup>-3</sup> | 1.2×10 <sup>-4</sup> | 1.3×10 <sup>-3</sup> | 6.2×10 <sup>-4</sup> |
|       |         | Concentration (mg/m <sup>3</sup> ) | 0.200                | 0.195                | 1.24                 | 0.195                | 1.24                 | 0.545                |
|       | VOCs    | Emission rate (kg/h)               | 3.3×10 <sup>-3</sup> | 3.1×10 <sup>-3</sup> | 1.8×10 <sup>-2</sup> | 3.1×10 <sup>-3</sup> | 1.8×10 <sup>-2</sup> | 8.3×10 <sup>-3</sup> |
|       |         | Concentration (mg/m <sup>3</sup> ) | 0.200                | 0.195                | 1.24                 | 0.195                | 1.24                 | 0.545                |
|       | Benzene | Emission rate (kg/h)               | 3.3×10 <sup>-3</sup> | 3.1×10 <sup>-3</sup> | 1.8×10 <sup>-2</sup> | 3.1×10 <sup>-3</sup> | 1.8×10 <sup>-2</sup> | 8.3×10 <sup>-3</sup> |
|       |         | Concentration (mg/m <sup>3</sup> ) | 0.200                | 0.195                | 1.24                 | 0.195                | 1.24                 | 0.545                |

| Point | Type    | Result                             | Mar                  | Jun                  | Sept                 | Min                  | Max                  | Average              |
|-------|---------|------------------------------------|----------------------|----------------------|----------------------|----------------------|----------------------|----------------------|
| I     | VOCs    | Concentration (mg/m <sup>3</sup> ) | 0.062                | 0.145                | 0.950                | 0.062                | 0.950                | 0.386                |
|       |         | Emission rate (kg/h)               | 6.3×10 <sup>-3</sup> | 0.14                 | 8.9×10 <sup>-2</sup> | 6.3×10 <sup>-3</sup> | 0.14                 | 7.8×10 <sup>-2</sup> |
|       | Benzene | Concentration (mg/m <sup>3</sup> ) | 0.012                | 0.007                | 0.071                | 0.007                | 0.071                | 0.03                 |
|       |         | Emission rate (kg/h)               | 1.2×10 <sup>-3</sup> | 6.3×10 <sup>-4</sup> | 6.6×10 <sup>-3</sup> | 6.3×10 <sup>-4</sup> | 6.6×10 <sup>-3</sup> | 2.8×10 <sup>-3</sup> |
|       | Toluene | Concentration (mg/m <sup>3</sup> ) | ND                   | 0.032                | 0.059                | ND                   | 0.059                | 0.031                |
|       |         | Emission rate (kg/h)               | 2.0×10 <sup>-4</sup> | 3.1×10 <sup>-3</sup> | 5.4×10 <sup>-3</sup> | 2.0×10 <sup>-4</sup> | 5.4×10 <sup>-3</sup> | 2.9×10 <sup>-3</sup> |
|       | Xylene  | Concentration (mg/m <sup>3</sup> ) | 0.015                | 1.14                 | 0.158                | 0.015                | 1.14                 | 0.438                |
|       |         | Emission rate (kg/h)               | 1.6×10 <sup>-3</sup> | 0.11                 | 1.5×10 <sup>-2</sup> | 1.6×10 <sup>-3</sup> | 0.11                 | 4.2×10 <sup>-2</sup> |
|       | VOCs    | Concentration (mg/m <sup>3</sup> ) | 1.48                 | 0.205                | 0.255                | 0.205                | 1.48                 | 0.647                |
|       |         | Emission rate (kg/h)               | 0.14                 | 1.9×10 <sup>-2</sup> | 2.3×10 <sup>-2</sup> | 1.9×10 <sup>-2</sup> | 0.14                 | 6.1×10 <sup>-2</sup> |
|       | Benzene | Concentration (mg/m <sup>3</sup> ) | 1.17                 | 0.205                | 0.198                | 0.205                | 1.17                 | 0.524                |
|       |         | Emission rate (kg/h)               | 0.11                 | 1.9×10 <sup>-2</sup> | 1.8×10 <sup>-2</sup> | 1.8×10 <sup>-2</sup> | 0.11                 | 4.9×10 <sup>-2</sup> |
| J     | Toluene | Concentration (mg/m <sup>3</sup> ) | 0.158                | ND                   | 0.016                | ND                   | 0.158                | 0.059                |
|       |         | Emission rate (kg/h)               | 1.4×10 <sup>-2</sup> | 1.8×10 <sup>-4</sup> | 1.4×10 <sup>-3</sup> | 1.6×10 <sup>-4</sup> | 1.3×10 <sup>-2</sup> | 5.5×10 <sup>-3</sup> |
|       | Xylene  | Concentration (mg/m <sup>3</sup> ) | 0.013                | 0.016                | ND                   | ND                   | 0.016                | 0.01                 |
|       |         | Emission rate (kg/h)               | 1.2×10 <sup>-3</sup> | 1.5×10 <sup>-3</sup> | 1.9×10 <sup>-4</sup> | 1.9×10 <sup>-4</sup> | 1.5×10 <sup>-3</sup> | 9.6×10 <sup>-4</sup> |
|       | VOCs    | Concentration (mg/m <sup>3</sup> ) | 0.300                | 2.21                 | 0.329                | 0.300                | 2.21                 | 0.946                |
|       |         | Emission rate (kg/h)               | 1.8×10 <sup>-3</sup> | 1.4×10 <sup>-2</sup> | 2.1×10 <sup>-3</sup> | 1.6×10 <sup>-3</sup> | 1.2×10 <sup>-2</sup> | 5.7×10 <sup>-3</sup> |
|       | Benzene | Concentration (mg/m <sup>3</sup> ) | 0.063                | 0.007                | 0.025                | 0.007                | 0.063                | 0.032                |
|       |         | Emission rate (kg/h)               | 3.7×10 <sup>-4</sup> | 4.2×10 <sup>-5</sup> | 1.5×10 <sup>-4</sup> | 4.2×10 <sup>-5</sup> | 3.7×10 <sup>-4</sup> | 1.9×10 <sup>-4</sup> |
|       | Toluene | Concentration (mg/m <sup>3</sup> ) | 0.006                | 0.048                | 0.033                | 0.008                | 0.047                | 0.030                |
|       |         | Emission rate (kg/h)               | 4.1×10 <sup>-5</sup> | 3.0×10 <sup>-4</sup> | 1.9×10 <sup>-4</sup> | 4.1×10 <sup>-5</sup> | 3.0×10 <sup>-4</sup> | 1.8×10 <sup>-4</sup> |
|       | Xylene  | Concentration (mg/m <sup>3</sup> ) | 0.143                | 0.011                | 1.84                 | 0.011                | 1.84                 | 0.665                |
|       |         | Emission rate (kg/h)               | 8.3×10 <sup>-4</sup> | 6.6×10 <sup>-5</sup> | 1.1×10 <sup>-2</sup> | 6.6×10 <sup>-5</sup> | 1.1×10 <sup>-2</sup> | 4.0×10 <sup>-3</sup> |
| K     | VOCs    | Concentration (mg/m <sup>3</sup> ) | 0.300                | 2.21                 | 0.329                | 0.300                | 2.21                 | 0.946                |
|       |         | Emission rate (kg/h)               | 1.8×10 <sup>-3</sup> | 1.4×10 <sup>-2</sup> | 2.1×10 <sup>-3</sup> | 1.6×10 <sup>-3</sup> | 1.2×10 <sup>-2</sup> | 5.7×10 <sup>-3</sup> |
|       | Benzene | Concentration (mg/m <sup>3</sup> ) | 0.063                | 0.007                | 0.025                | 0.007                | 0.063                | 0.032                |
|       |         | Emission rate (kg/h)               | 3.7×10 <sup>-4</sup> | 4.2×10 <sup>-5</sup> | 1.5×10 <sup>-4</sup> | 4.2×10 <sup>-5</sup> | 3.7×10 <sup>-4</sup> | 1.9×10 <sup>-4</sup> |
|       | Toluene | Concentration (mg/m <sup>3</sup> ) | 0.006                | 0.048                | 0.033                | 0.008                | 0.047                | 0.030                |
|       |         | Emission rate (kg/h)               | 4.1×10 <sup>-5</sup> | 3.0×10 <sup>-4</sup> | 1.9×10 <sup>-4</sup> | 4.1×10 <sup>-5</sup> | 3.0×10 <sup>-4</sup> | 1.8×10 <sup>-4</sup> |
|       | Xylene  | Concentration (mg/m <sup>3</sup> ) | 0.143                | 0.011                | 1.84                 | 0.011                | 1.84                 | 0.665                |
|       |         | Emission rate (kg/h)               | 8.3×10 <sup>-4</sup> | 6.6×10 <sup>-5</sup> | 1.1×10 <sup>-2</sup> | 6.6×10 <sup>-5</sup> | 1.1×10 <sup>-2</sup> | 4.0×10 <sup>-3</sup> |

Note: "ND" was not detected. The detection limit of this method was 0.004mg/m<sup>3</sup>. For undetected items, the emission rate and average value will be calculated based on half of the detection limit.

## 2. Statistics of test results of main pollutants from stationary sources

According to the survey results, the average total emission concentration of VOCs from 11 fixed pollution sources was between  $0.138\text{mg}/\text{m}^3$  and  $1.310\text{mg}/\text{m}^3$ . According to the single test result, the emission concentration was between ND  $\sim 2.210\text{mg}/\text{m}^3$ . The two pollution sources with the highest average concentration were H and K, and their concentrations were  $1.310\text{mg}/\text{m}^3$  and  $0.946\text{mg}/\text{m}^3$  respectively. The highest concentrations of a single test were K and E, and their concentrations were  $2.210\text{ mg}/\text{m}^3$  and  $1.930\text{ mg}/\text{m}^3$  respectively. As shown in Figure S1:

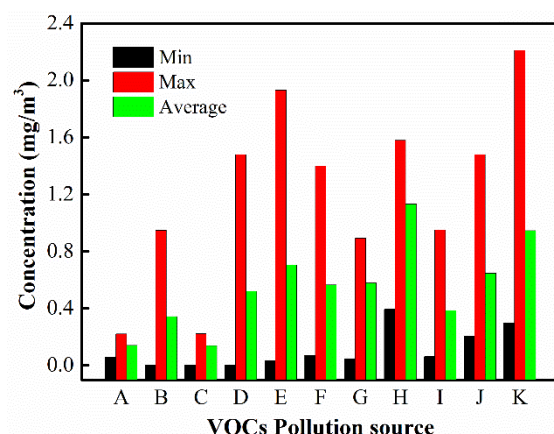

**Figure S1.** Distribution of VOCs emission concentration.

The average emission concentration of benzene in 11 fixed pollution sources was between  $0.012\text{mg}/\text{m}^3$  and  $0.524\text{mg}/\text{m}^3$ . The distribution range of the single test result was between ND  $\sim 1.170\text{mg}/\text{m}^3$ . The two pollution sources with the highest average concentration were J and C, and their concentrations were respectively  $0.524\text{mg}/\text{m}^3$  and  $0.072\text{mg}/\text{m}^3$ . The highest concentrations in a single detection were J and C, and their concentrations were  $1.170\text{ mg}/\text{m}^3$  and  $0.160\text{ mg}/\text{m}^3$  respectively. As shown in Figure S2:

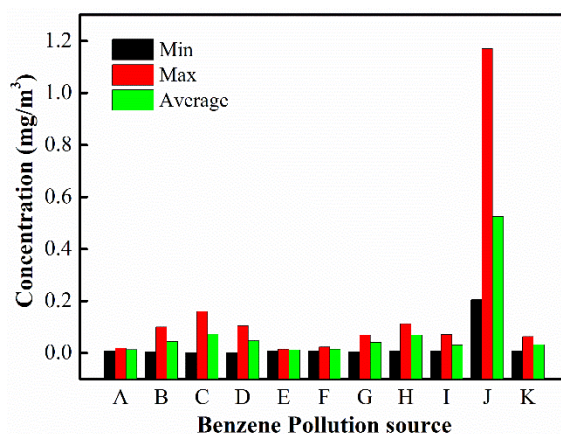

**Figure S2.** Distribution of benzene emission concentration.

The average emission concentration of toluene in the 11 fixed pollution sources was between  $0.009\text{mg}/\text{m}^3$ – $0.059\text{mg}/\text{m}^3$ . The distribution range of this single test result was between ND  $\sim 0.160\text{mg}/\text{m}^3$ . The two pollution sources with the highest average concentration were J and C, and their concentrations were respectively  $0.059\text{mg}/\text{m}^3$  and  $0.055\text{mg}/\text{m}^3$ . The highest concentrations in a single detection were J and C, and their concentrations were  $0.158\text{mg}/\text{m}^3$  and  $0.160\text{mg}/\text{m}^3$ , respectively. As shown in Figure S3:

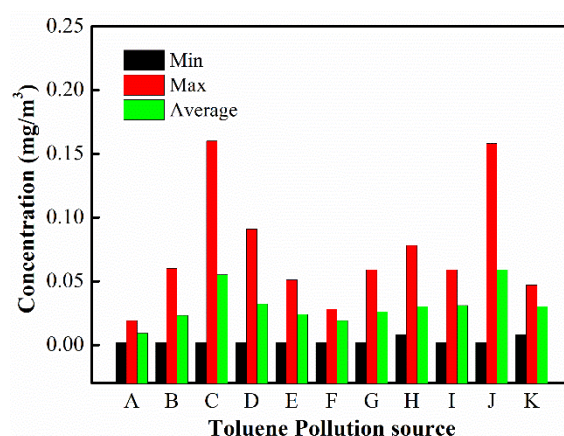

**Figure S3.** Concentration distribution of toluene emission.

The average emission concentration of xylene from the 11 fixed pollution sources was between 0.010mg/m<sup>3</sup> and 0.665mg/m<sup>3</sup>. The distribution range of this single test result was between ND ~1.840mg/m<sup>3</sup>. The two pollution sources with the highest average concentration were K and H, and their concentrations were 0.665mg/m<sup>3</sup> and 0.545mg/m<sup>3</sup> respectively. The highest concentrations in a single detection were K and E, and their concentrations were 1.840mg/m<sup>3</sup> and 1.500mg/m<sup>3</sup> respectively. As shown in Figure S4:

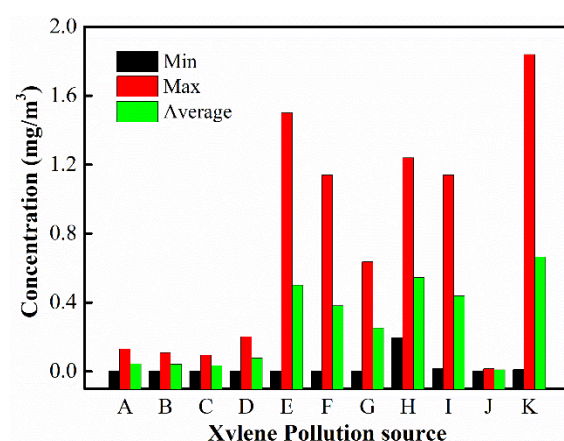

**Figure S4.** Distribution of xylene emission concentration.

According to Figure S5, it could be seen that the average VOC emission rate of 11 fixed pollution sources ranges from  $4.3 \times 10^{-3}$  kg/h to  $7.8 \times 10^{-2}$  kg/h. The single test result was between  $6.3 \times 10^{-5}$  kg/h~0.14kg/h. The two pollution sources with the highest average emission rate were I and J, with emission rates of  $7.8 \times 10^{-2}$  kg/h and  $6.1 \times 10^{-2}$  kg/h respectively. The highest concentrations in a single test were I and J, and their concentrations were both 0.14 kg/h.

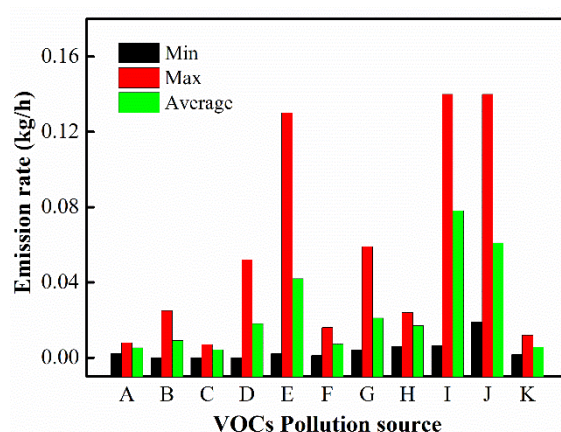

Figure S5. Distribution of VOCs emission rate.

According to Figure S6, it could be seen that the average emission rate of benzene from the 11 fixed pollution sources was between  $1.8 \times 10^{-5}$  kg/h and  $4.9 \times 10^{-2}$  kg/h. The single test result was between  $1.6 \times 10^{-5}$  kg/h~0.11 kg/h. The two pollution sources with the highest average emission rate were J and G, and their emission rates were  $4.9 \times 10^{-2}$  kg/h and  $2.9 \times 10^{-3}$  kg/h respectively. The highest concentrations in a single test were J and I, and their concentrations were 0.11 kg/h and  $6.6 \times 10^{-3}$  kg/h respectively.

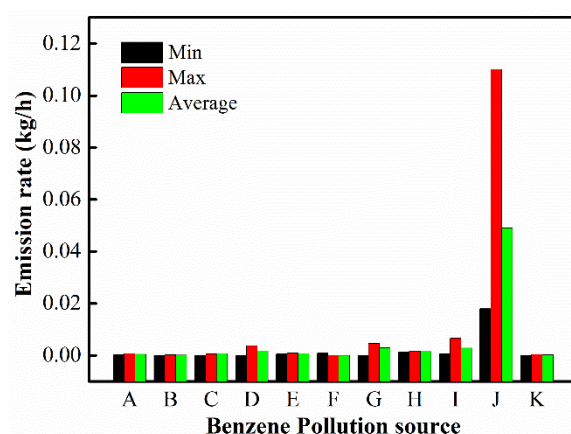

Figure S6. Distribution of benzene emission rate.

According to Figure S7, it could be seen that the average toluene emission rate of 11 fixed pollution sources was between  $1.8 \times 10^{-4}$  kg/h~ $5.5 \times 10^{-3}$  kg/h. The result of a single test was between  $2.9 \times 10^{-5}$  kg/h and  $1.3 \times 10^{-2}$  kg/h. The two pollution sources with the highest average emission rate were J and I, and their emission rates were  $5.5 \times 10^{-3}$  kg/h and  $2.9 \times 10^{-3}$  kg/h respectively. The highest concentration in a single test was J and I, and their concentrations were  $1.3 \times 10^{-2}$  kg/h and  $5.4 \times 10^{-3}$  kg/h respectively.

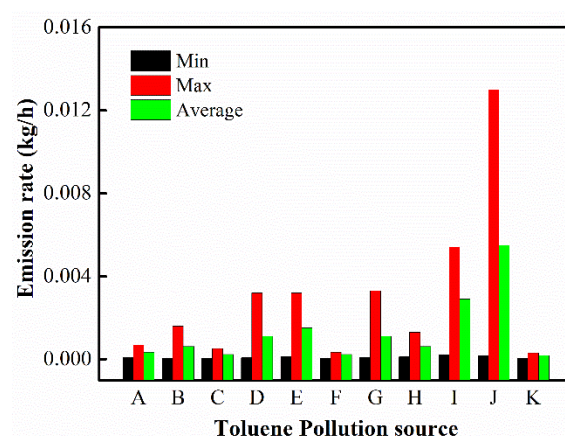

Figure S7. Distribution of toluene emission rate.

According to Figure S8, it could be seen that the average emission rate of xylene from the 11 fixed pollution sources was between  $1 \times 10^{-4}$  kg/h and  $4.2 \times 10^{-2}$  kg/h. The result of a single test was between  $2.4 \times 10^{-5}$  kg/h~0.11 kg/h. The two pollution sources with the highest average emission rate were I and E, and their emission rates were  $4.2 \times 10^{-2}$  kg/h and  $3.1 \times 10^{-2}$  kg/h, respectively. The highest concentrations in a single test were I and E, and their concentrations were 0.11 kg/h and  $9.2 \times 10^{-2}$  kg/h respectively.

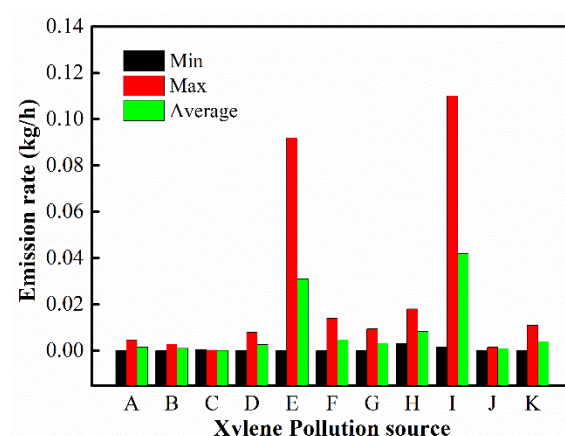

Figure S8. Xylene emission rate distribution.

### 3. Statistics of typical pollutant emissions

According to the emission concentration and emission intensity, the maximum emission values of benzene, toluene, and xylene were counted. The situation was shown in Table S2 and Table S3:

Table S2. Statistics of the maximum emission concentration of benzene, toluene and xylene.

| Type        | Benzene |                                    | Toluene |                                    | Xylene |                                    |
|-------------|---------|------------------------------------|---------|------------------------------------|--------|------------------------------------|
|             | Point   | Concentration (mg/m <sup>3</sup> ) | Point   | Concentration (mg/m <sup>3</sup> ) | Point  | Concentration (mg/m <sup>3</sup> ) |
| Max average | J       | 0.524                              | J       | 0.059                              | K      | 0.665                              |
|             | C       | 0.072                              | C       | 0.055                              | H      | 0.545                              |
| Single Max  | J       | 1.170                              | J       | 0.158                              | K      | 1.840                              |
|             | C       | 1.600                              | C       | 0.160                              | E      | 1.500                              |

Table S3. Statistics of maximum emission intensity of benzene, toluene and xylene.

| Type | Benzene | Toluene | Xylene |
|------|---------|---------|--------|
|------|---------|---------|--------|

|             | Point | Rate (kg/h)          | Point | Rate (kg/h)          | Point | Rate (kg/h)          |
|-------------|-------|----------------------|-------|----------------------|-------|----------------------|
| Max average | J     | $4.9 \times 10^{-2}$ | J     | $5.5 \times 10^{-3}$ | I     | $4.2 \times 10^{-2}$ |
|             | G     | $2.9 \times 10^{-3}$ | I     | $2.9 \times 10^{-3}$ | E     | $3.1 \times 10^{-2}$ |
| Single Max  | J     | 0.11                 | J     | $1.3 \times 10^{-2}$ | I     | 0.11                 |
|             | I     | $6.6 \times 10^{-3}$ | I     | $5.4 \times 10^{-3}$ | E     | $9.2 \times 10^{-2}$ |

#### 4. Discharge points of fixed pollution sources in the factory

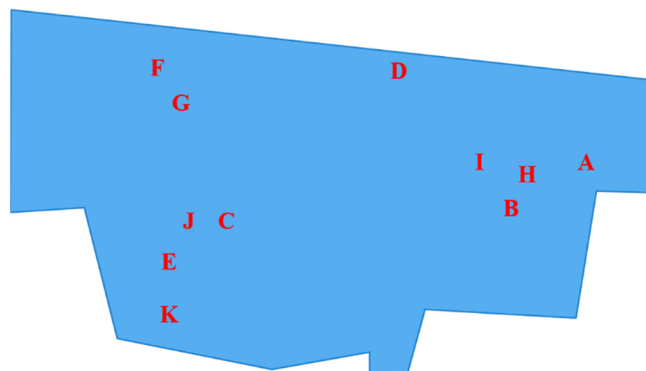

**Figure S9.** Stationary pollution source discharge point.
